# Supplementary material for: Highly sensitive electrochemical sensing of para-chloronitrobenzene using a carbon nanohorn–nanotube hybrid modified electrode
Source: Royal Society of Chemistry journal article supplement (doi:10.1039/c8ay02680g), 2019-01-01
Supplement: c8ay02680g1.pdf [file c8ay02680g1.pdf]

## **Electronic supplementary information**

### **Highly sensitive electrochemical sensing of para-chloronitrobenzene by using carbon nanohorns-nanotubes hybrids modified electrode**

Gangbing Zhu<sup>a,b\*</sup>, Mwenze Nkulu Fiston<sup>a</sup>, Junjuan Qian<sup>a</sup>, Odoo Jibrael Kingsford

<sup>a</sup> School of the Environment and Safety Engineering, Jiangsu University, Zhenjiang, 212013, P. R. China

<sup>b</sup> State Key Laboratory of Chemo/Biosensing and Chemometrics, Hunan University, Changsha, 410082, P.R. China

---

\* Corresponding author.  
E-mail address: [zhgb1030@ujs.edu.cn](mailto:zhgb1030@ujs.edu.cn)

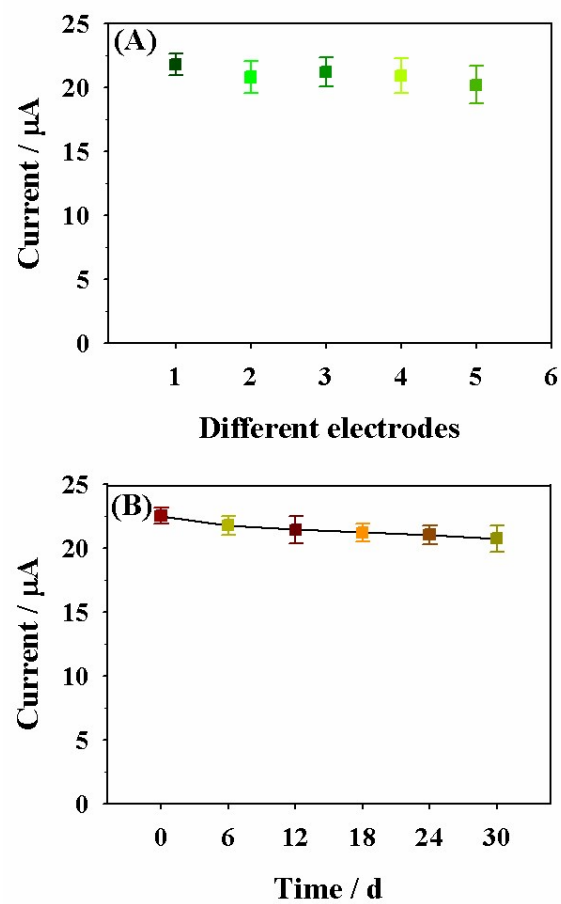

**Figure S1.** (A) The peak current value of PCNB at independently fabricated electrodes and (B) the stability of the CNHs-CNTs/GCE.

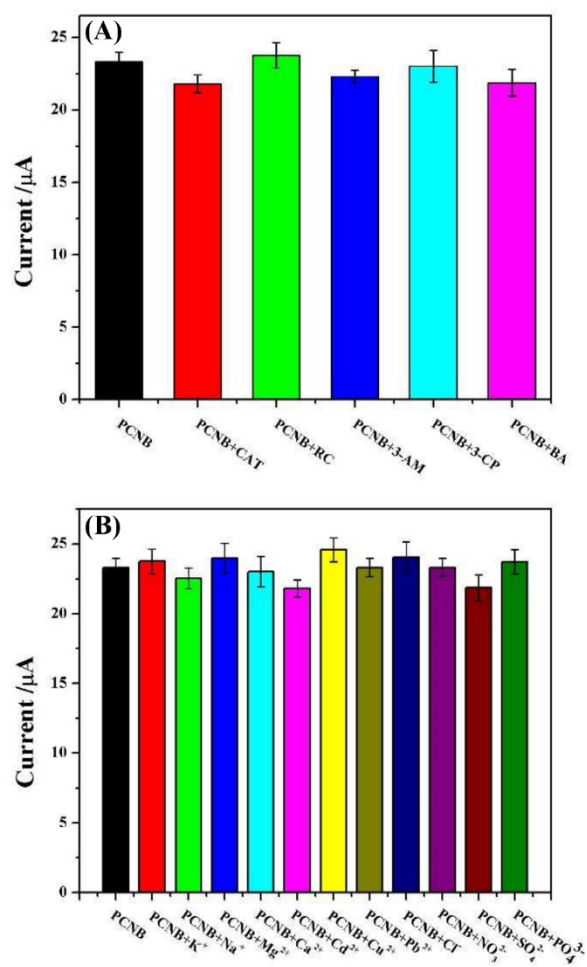

**Figure S2.** The peak current value of PCNB containing inorganic ions (A) and organic compounds (B).
